# Supplementary material for: Somatic CRISPR–Cas9-induced mutations reveal roles of embryonically essential dynein chains in Caenorhabditis elegans cilia
Source: PubMed Central journal article supplement — J Cell Biol. 2015 Mar 16;208(6):683–92. doi: 10.1083/jcb.201411041 (PMC4362450; doi:10.1083/jcb.201411041), 2015-03-16
Supplement: supp_jcb.201411041_JCB_201411041_sm.pdf [file supp_jcb.201411041_JCB_201411041_sm.pdf]

Li et al., <http://www.jcb.org/cgi/content/full/jcb.201411041/DC1>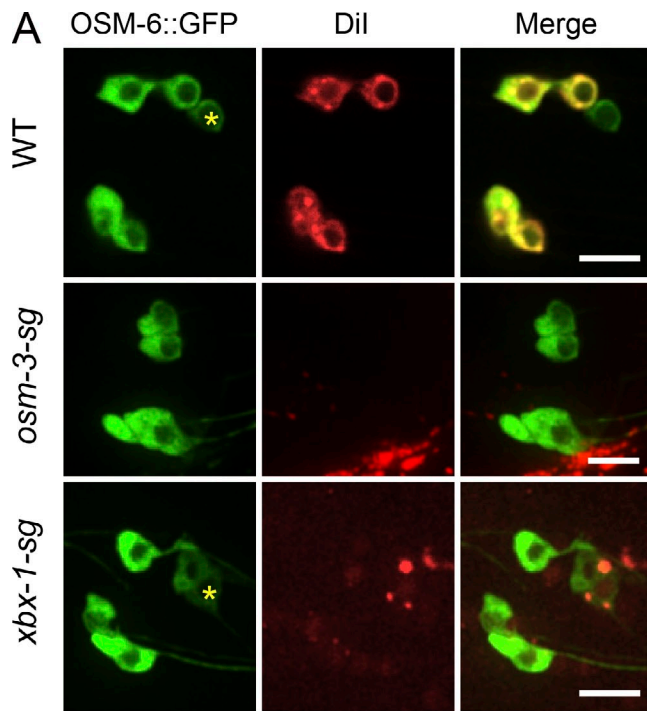

**Figure S1. The Dyf phenotype in *osm-3-sg* or *xbx-1-sg* animals.** (A) The dye-filling phenotype of four phasmid neurons (PHA/B/L/R) of WT, *osm-3-sg*, and *xbx-1-sg* conditional mutants under a 100 $\times$  objective lens. The asterisk indicates a PQR neuron, which does not take up Dil in WT animals. Bar, 5  $\mu$ m. (B) The Dyf defects in *osm-3-sg* and *xbx-1-sg* conditional mutants as observed under a fluorescence stereoscope. The head and the tail of the ciliated sensory neurons are stained by the red fluorescent Dil dye in WT animals, whereas a dye-filling defect is observed in conditional mutant animals. The asterisk indicates the transgenic marker. Non-hs, nonheat shock; hs, heat shock. Bar, 50  $\mu$ m.

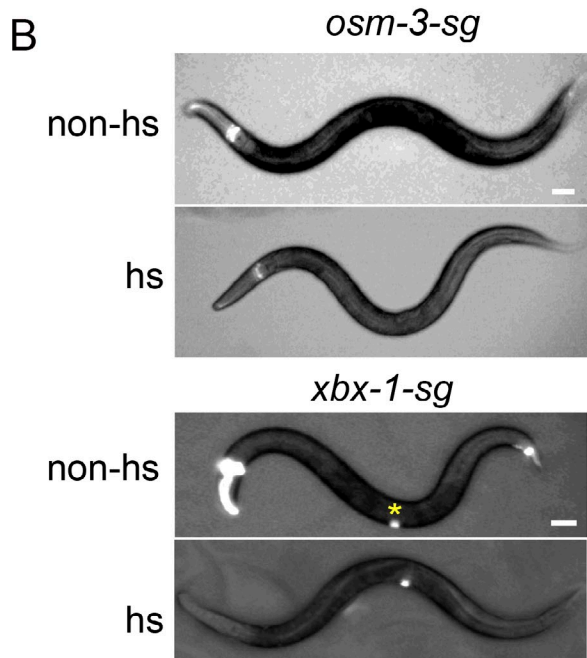

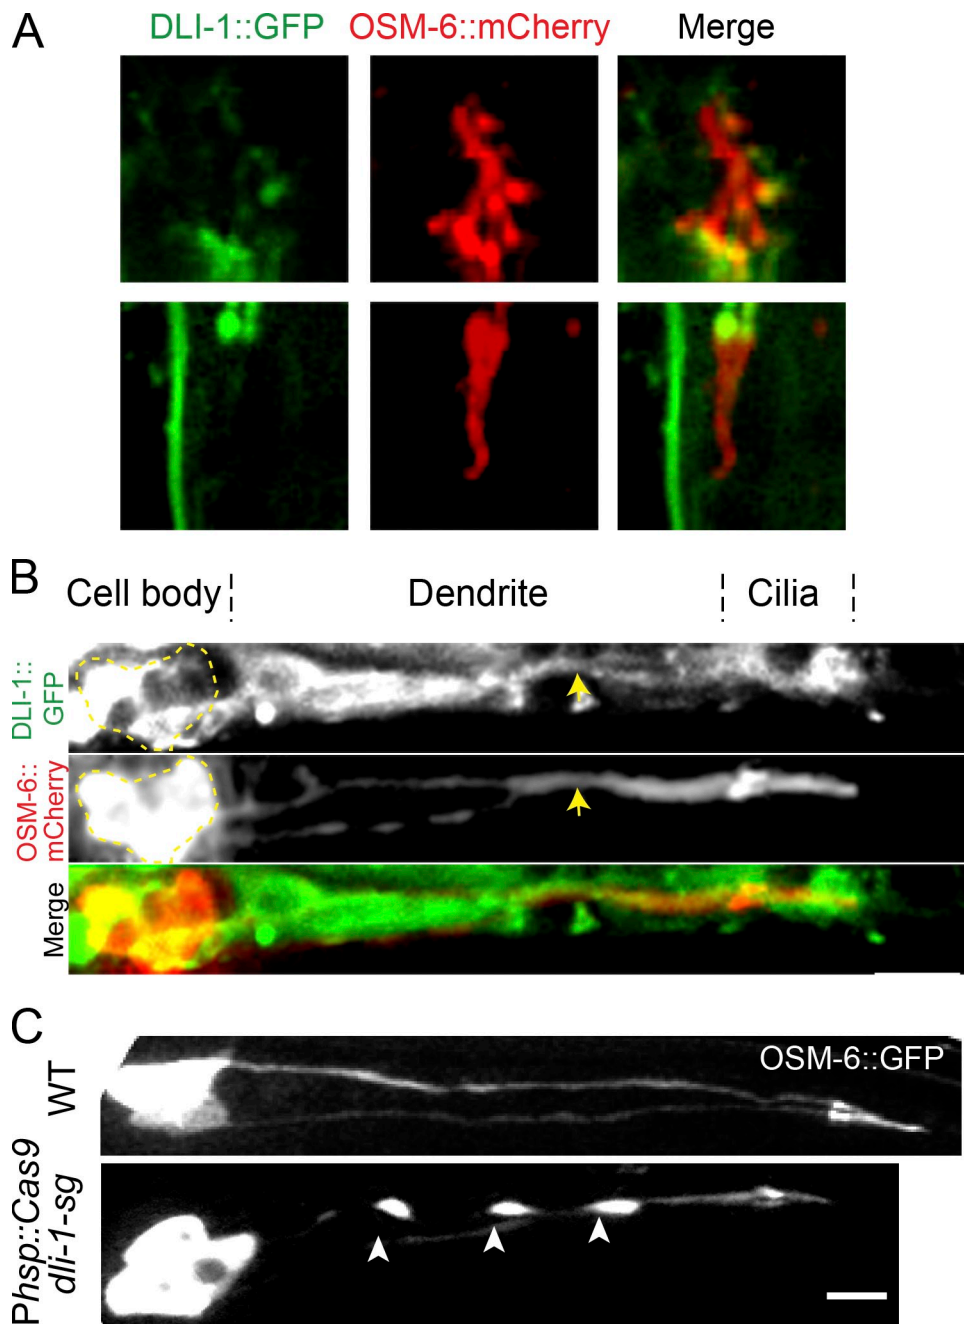

Figure S2. **DLI-1 functions in *C. elegans* ciliated neurons.** (A and B) Animals expressing *Pdli-1::dli-1::GFP* illustrate that DLI-1 does not enter the cilia (A) but localizes in the cell body and dendrites of ciliated neurons (B, arrows). The broken outlines indicate the junctions between segments within ciliated neurons. (C) Aggregates of OSM-6::GFP (arrows) along the dendrite are observed in *dli-1* conditional mutant animals. Bar, 5  $\mu$ m.

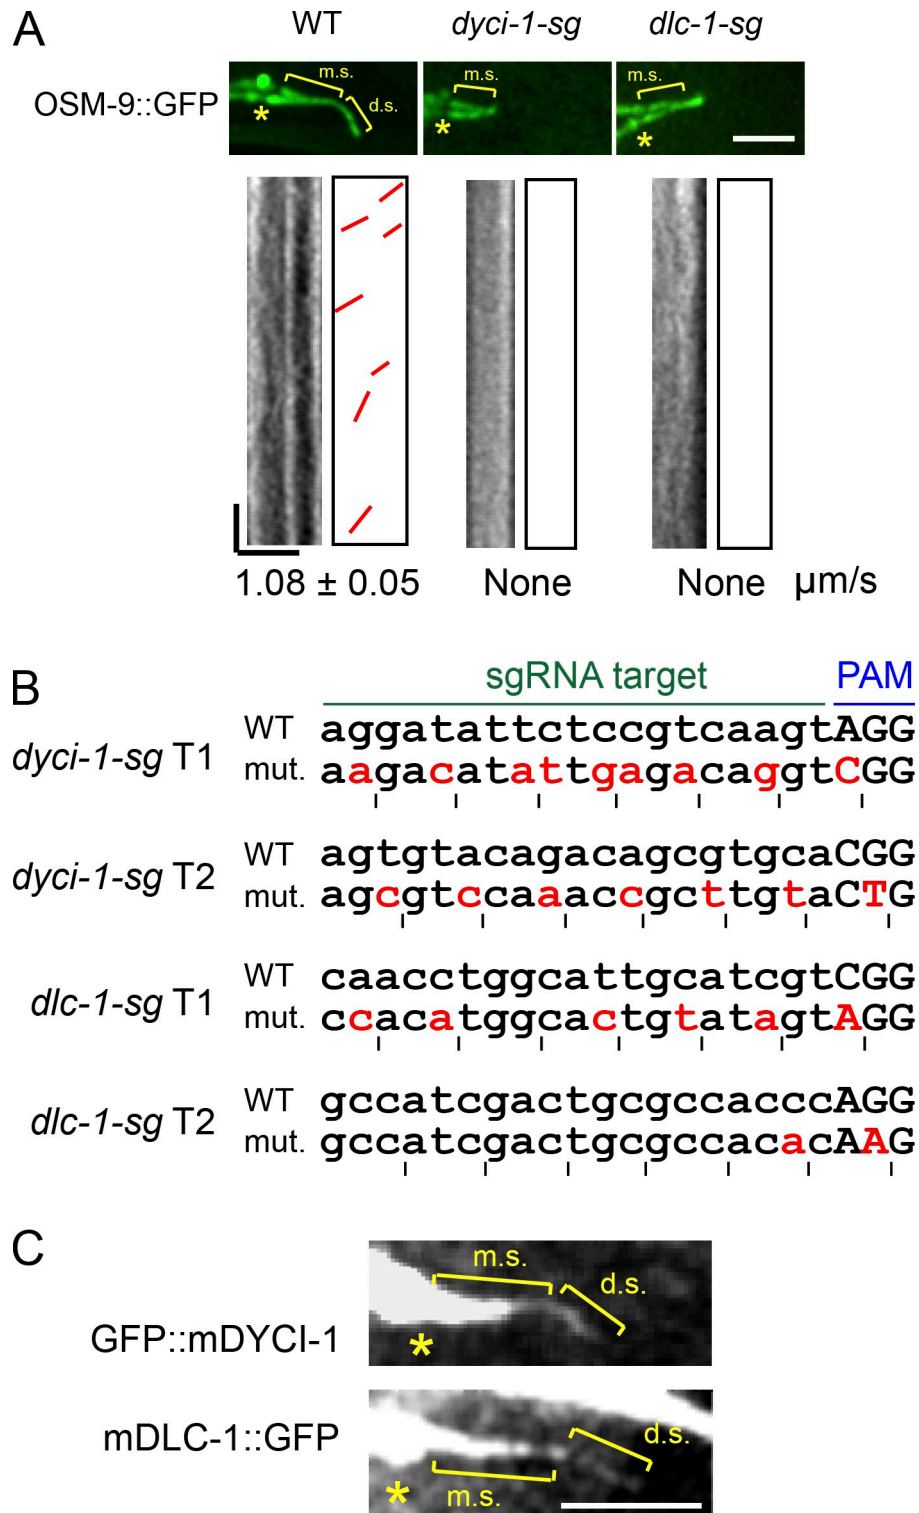

Figure S3. **GFP-tagged DYCI-1 and DLC-1 with synonymous mutations rescued ciliary phenotypes in the corresponding conditional mutants.** (A) The retrograde movement of OSM-9::GFP in cilia of WT, *dyci-1-sg*, and *dlc-1-sg* conditional mutant animals. (top) OSM-9::GFP localization. (bottom) Kymographs and corresponding lines of the movement. Bars: (micrograph bar on top) 5  $\mu\text{m}$ ; (kymograph horizontal bar) 2  $\mu\text{m}$ ; (vertical bar) 5 s. (B) Synonymous mutations (red) of the target sites in *dyci-1* and *dlc-1*. (C) The localization of GFP-tagged DYCI-1 and DLC-1 with synonymous mutations in cilia of *dyci-1-sg* and *dlc-1-sg* conditional mutant animals. Bar, 5  $\mu\text{m}$ . m.s., middle segment; d.s., distal segment. The asterisks indicate the transition zone.

Table S1. *C. elegans* strains used in this study

| Strain name | Genotype                                                                                                                                                                      | Method                                        |
|-------------|-------------------------------------------------------------------------------------------------------------------------------------------------------------------------------|-----------------------------------------------|
| SP2101      | ncl-1(e1865) unc-36(e251); osm-6(p811); mnl-17[Posm-6::osm-6::GFP; unc-36(+)]                                                                                                 | CGC                                           |
| JT11069     | xbx-1(ok279)                                                                                                                                                                  | CGC, a 1,600-bp deletion                      |
| CX3716      | lin-15B(n765); klys141[Posm-9::osm-9::gfp; lin-15(+)]                                                                                                                         | CGC                                           |
| GOU1348     | casEx1605[Phsp-16.2::Cas9+PU6::che-3 sgRNA; Podr-1::dsRed; unc-76(+)]; mnl-17                                                                                                 | Microinjection and cross with <i>mnl-17</i>   |
| GOU1411     | casEx5520[Phsp-16.2::Cas9+PU6::lis-1-T1/2 sgRNA; Podr-1::dsRed; unc-76(+)]; mnl-17                                                                                            | Microinjection and cross with <i>mnl-17</i>   |
| GOU1417     | casEx5512[Phsp-16.2::Cas9+PU6::dlc-1-T1/2 sgRNA; Podr-1::dsRed; unc-76(+)]; mnl-17                                                                                            | Microinjection and cross with <i>mnl-17</i>   |
| GOU1418     | casEx5514[Phsp-16.2::Cas9+PU6::dyci-1-T1/2 sgRNA; Podr-1::dsRed; unc-76(+)]; mnl-17                                                                                           | Microinjection and cross with <i>mnl-17</i>   |
| GOU1419     | casEx5513[Phsp-16.2::Cas9+PU6::dli-1-T1/2 sgRNA; Podr-1::dsRed; unc-76(+)]; mnl-17                                                                                            | Microinjection and cross with <i>mnl-17</i>   |
| GOU1421     | casEx5516[Phsp-16.2::Cas9+PU6::dylt-3 sgRNA; Podr-1::dsRed; unc-76(+)]; mnl-17                                                                                                | Microinjection and cross with <i>mnl-17</i>   |
| GOU1422     | casEx5517[Phsp-16.2::Cas9+PU6::dyrb-1 sgRNA; Podr-1::dsRed; unc-76(+)]; mnl-17                                                                                                | Microinjection and cross with <i>mnl-17</i>   |
| GOU1423     | casEx5534[Phsp-16.2::Cas9+PU6::osm-1-T1/2 sgRNA; Pegl-17::Myri-mCherry; Pegl-17::mCherry::his-24]; mnl-17                                                                     | Microinjection and cross with <i>mnl-17</i>   |
| GOU1442     | casl-482[Phsp-16.2::Cas9+PU6::dyci-1 sgRNA T1/2; Podr-1::dsRed (+)]; mnl-17                                                                                                   | Cross with <i>mnl-17</i>                      |
| GOU1444     | casEx1629[Phsp-16.2::Cas9+PU6::che-11 sgRNA; Pegl-17::Myri-mCherry; Pegl-17::mCherry::his-24]; mnl-17                                                                         | Microinjection and cross with <i>mnl-17</i>   |
| GOU1448     | casEx1633[Pxbx-1::xbx-1::YFP; rol-6(su1006) (+)]; casl-482                                                                                                                    | Microinjection and cross with <i>casl-482</i> |
| GOU1453     | xbx-1(ok279); casEx1630[Pdyf-1::gfp::dyci-1; Pdyf-1::osm-6::mCherry; rol-6(su1006) (+)]                                                                                       | Microinjection                                |
| GOU1461     | casEx5524[Phsp-16.2::Cas9+PU6::osm-12-T1/2 sgRNA; Pegl-17::Myri-mCherry; Pegl-17::mCherry::his-24]; mnl-17                                                                    | Microinjection and cross with <i>mnl-17</i>   |
| GOU1460     | casEx1629[Phsp-16.2::Cas9+PU6::xbx-1 sgRNA; Pegl-17::Myri-mCherry; Pegl-17::mCherry::his-24]; mnl-17                                                                          | Microinjection                                |
| GOU1463     | casEx1629[Phsp-16.2::Cas9+PU6::xbx-1 sgRNA; Pegl-17::Myri-mCherry; Pegl-17::mCherry::his-24]; casl-482[Pdyf-1::Cas9; Podr-1::dsRed; unc-76(+)]; mnl-17                        | Cross with <i>casl-482</i>                    |
| GOU1464     | casEx5544[Phsp-16.2::Cas9+PU6::osm-3 sgRNA; Pdyf-1::osm-6::mCherry; Pegl-17::Myri-mCherry; Pegl-17::mCherry::his-24]                                                          | Microinjection                                |
| GOU1465     | casEx5535[Pdlc-1::dlc-1::GFP; Pdyf-1::osm-6::mCherry; unc-76(+)]                                                                                                              | Microinjection                                |
| GOU1466     | casEx5537[Pdylt-3::dylt-3::GFP; Pdyf-1::osm-6::mCherry; unc-76(+)]                                                                                                            | Microinjection                                |
| GOU1467     | casEx5527[Pdyf-1::GFP::dyci-1; Pdyf-1::osm-6::mCherry; rol-6(su1006) (+)]                                                                                                     | Microinjection                                |
| GOU1468     | casEx5523[Pdyci-1::dyci-1::GFP; Pdyf-1::osm-6::mCherry; rol-6(su1006) (+)]                                                                                                    | Microinjection                                |
| GOU1469     | casEx5538[Pdli-1::dli-1::GFP; Pdyf-1::osm-6::mCherry; unc-76(+)]                                                                                                              | Microinjection                                |
| GOU1470     | casEx5547[Pdyf-1::GFP::dli-1; Pdyf-1::osm-6::mCherry; unc-76(+)]                                                                                                              | Microinjection                                |
| GOU1471     | casEx5548[Plis-1::lis-1::GFP; Pdyf-1::osm-6::mCherry]                                                                                                                         | Microinjection                                |
| GOU1472     | casEx5549[Pdyf-1::GFP::lis-1; Pdyf-1::osm-6::mCherry]                                                                                                                         | Microinjection                                |
| GOU1473     | casEx5540[Phsp-16.2::Cas9+PU6::osm-3 sgRNA; Pdyf-1::Cas9; Pegl-17::Myri-mCherry; Pegl-17::mCherry::his-24]; mnl-17                                                            | Microinjection                                |
| GOU1474     | casl-482[Phsp-16.2::Cas9+PU6::dyci-1 sgRNA T1/2; Podr-1::dsRed (+)]                                                                                                           | Microinjection and integration                |
| GOU1475     | casl-482[Pdyf-1::Cas9; Podr-1::dsRed; unc-76(+)]                                                                                                                              | Microinjection and integration                |
| GOU1568     | casl-509; klys141                                                                                                                                                             | Cross with <i>klys141</i>                     |
| GOU1570     | casl-482; casEx1642[Pdyf-1::gfp::mdyci-1; Pegl-17::Myri-mCherry; Pegl-17::mCherry::his-24; rol-6(su1006) (+)]                                                                 | Microinjection                                |
| GOU1571     | casl-509[Phsp-16.2::Cas9+PU6::dlc-1 sgRNA T1/2; Podr-1::dsRed; unc-76(+)]; casEx1643[Pdlc-1::mdlc-1::GFP; Pegl-17::Myri-mCherry; Pegl-17::mCherry::his-24; rol-6(su1006) (+)] | Microinjection and integration                |
| GOU1584     | casl-482; klys141                                                                                                                                                             | Cross with <i>klys141</i>                     |

CGC, *Caenorhabditis* Genetics Center.Table S2. PCR products for construction of transgenic *C. elegans*

| PCR product                 | 5' primer (5' to 3')      | 3' primer (5' to 3')       | Template                   |
|-----------------------------|---------------------------|----------------------------|----------------------------|
| <i>Pdylt-3::dylt-3::GFP</i> | CAGCGTGAGTGAGAAGTTGGTCTAG | AAGGGCCCGTACGGCCGACTAGTAGG | N <sub>2</sub> Genomic DNA |

Table S3. Plasmids for construction of transgenic *C. elegans*

| Plasmid name                                                  | 5' primer (5' to 3')                             | 3' primer (5' to 3')                                | Notes                                                                 |
|---------------------------------------------------------------|--------------------------------------------------|-----------------------------------------------------|-----------------------------------------------------------------------|
| pDD162- <b>Phsp-16.2</b> ::Cas9+ PU6:: <i>dyci-1-T1</i> sgRNA | GATATTCTCCGTCAAGTGTTTAGAGCT<br>AGAAATAGC         | CTTGACGGAGAATATCCTCAAGACATCTC<br>GCAATAGGAGG        | PCR from pDD162- <b>Phsp-16.2</b> ::<br>Cas9+ PU6::Empty sgRNA        |
| pDD162- <b>Phsp-16.2</b> ::Cas9+ PU6:: <i>dyci-1-T2</i> sgRNA | TGTACAGACAGCGTGAGTTTTAGAGCT<br>AGAAATAGC         | GCACGCTGTCTGTACTCAAGACATCTC<br>GCAATAGGAGG          | PCR from pDD162- <b>Phsp-16.2</b> ::<br>Cas9+ PU6::Empty sgRNA        |
| pDD162- <b>Phsp-16.2</b> ::Cas9+ PU6:: <i>dlc-1-T1</i> sgRNA  | ACCTGGCATTGCATCGTGTTTAGAGCT<br>AGAAATAGC         | CGATGCAATGCCAGGTGCAAGACATCTC<br>GCAATAGGAGG         | PCR from pDD162- <b>Phsp-16.2</b> ::<br>Cas9+ PU6::Empty sgRNA        |
| pDD162- <b>Phsp-16.2</b> ::Cas9+ PU6:: <i>dlc-1-T2</i> sgRNA  | CATCGACTGCCACCCGTTTTAGAGCT<br>AGAAATAGC          | GGTGGCGCAGTCGATGGCCAAGACATCTC<br>GCAATAGGAGG        | PCR from pDD162- <b>Phsp-16.2</b> ::<br>Cas9+ PU6::Empty sgRNA        |
| pDD162- <b>Phsp-16.2</b> ::Cas9+ PU6:: <i>dli-1-T1</i> sgRNA  | AGCAAATGCTGTGCTTCGTTTTAGAGCT<br>AGAAATAGC        | AAGCACAGCAATTTGCTGTCAAGACATCTC<br>GCAATAGGAGG       | PCR from pDD162- <b>Phsp-16.2</b> ::<br>Cas9+ PU6::Empty sgRNA        |
| pDD162- <b>Phsp-16.2</b> ::Cas9+ PU6:: <i>dli-1-T2</i> sgRNA  | TCGACAGACGAAGAAGTGTTTAGAGCT<br>AGAAATAGC         | CTTCTTCGTCTGTGCAAGCAAGACATCTC<br>GCAATAGGAGG        | PCR from pDD162- <b>Phsp-16.2</b> ::<br>Cas9+ PU6::Empty sgRNA        |
| pDD162- <b>Phsp-16.2</b> ::Cas9+ PU6:: <i>dylt-3</i> sgRNA    | CACAAATTTCTGTGTCTGTTTTAGAGCT<br>AGAAATAGC        | ACACACAGAAATTTGTGTCAAGACATCTC<br>GCAATAGGAGG        | PCR from pDD162- <b>Phsp-16.2</b> ::<br>Cas9+ PU6::Empty sgRNA        |
| pDD162- <b>Phsp-16.2</b> ::Cas9+ PU6:: <i>dyrb-1</i> sgRNA    | CATGATTGCTCCAGACAGTTTTAGAGCT<br>AGAAATAGC        | GTCTGGAGCAATCATGATCAAGACATCTC<br>GCAATAGGAGG        | PCR from pDD162- <b>Phsp-16.2</b> ::<br>Cas9+ PU6::Empty sgRNA        |
| pDD162- <b>Phsp-16.2</b> ::Cas9+ PU6:: <i>lis-1-T1</i> sgRNA  | ACATGAGTTTTGTCGGAGTTTTAGAGCT<br>AGAAATAGC        | TCCGACAAACTCATGTTGCAAGACATCTC<br>GCAATAGGAGG        | PCR from pDD162- <b>Phsp-16.2</b> ::<br>Cas9+ PU6::Empty sgRNA        |
| pDD162- <b>Phsp-16.2</b> ::Cas9+ PU6:: <i>lis-1-T2</i> sgRNA  | GATATCAAGCCACTAGGTTTTAGAGCT<br>AGAAATAGC         | CTAGTGGCTTGATATCATCAAGACATCTC<br>GCAATAGGAGG        | PCR from pDD162- <b>Phsp-16.2</b> ::<br>Cas9+ PU6::Empty sgRNA        |
| pDD162- <b>Phsp-16.2</b> ::Cas9+ PU6:: <i>osm-3</i> sgRNA     | GGCACTGTGTTGCTAGTTTTAGAGCT<br>AGAAATAGC          | AGGCAAACACAGTGCCATCAAGACATCTC<br>GCAATAGGAGG        | PCR from pDD162- <b>Phsp-16.2</b> ::<br>Cas9+ PU6::Empty sgRNA        |
| pDD162- <b>Phsp-16.2</b> ::Cas9+ PU6:: <i>xbx-1</i> sgRNA     | CGAGTCATTTGCGATTGTTTTAGAGCTA<br>GAAATAGC         | ATGCGAAATGACTCGTCAAGACATCTCG<br>AATAGGAGG           | PCR from pDD162- <b>Phsp-16.2</b> ::<br>Cas9+ PU6::Empty sgRNA        |
| pDD162- <b>Phsp-16.2</b> ::Cas9+ PU6:: <i>che-3</i> sgRNA     | AGTCGGGATTTCCAATTGTTTTAGAGCT<br>AGAAATAGC        | TTGAAATCCCGACTCAAGACATCTCG<br>AATAGGAGG             | PCR from pDD162- <b>Phsp-16.2</b> ::<br>Cas9+ PU6::Empty sgRNA        |
| pDD162- <b>Phsp-16.2</b> ::Cas9+ PU6:: <i>che-11</i> sgRNA    | GTAGATTGGAGCCACGAGTTTTAGAGCT<br>AGAAATAGC        | GTGGCTCCAATCTACTCCAAGACATCTCG<br>CAATAGGAGG         | PCR from pDD162- <b>Phsp-16.2</b> ::<br>Cas9+ PU6::Empty sgRNA        |
| pDD162- <b>Phsp-16.2</b> ::Cas9+ PU6:: <i>osm-1-T1</i> sgRNA  | AGTTCCCTCCGTACAATTGTTTTAGAGCT<br>AGAAATAGC       | TTGTACGGAGGAACCTGCAAGACATCTCG<br>CAATAGGAGG         | PCR from pDD162- <b>Phsp-16.2</b> ::<br>Cas9+ PU6::Empty sgRNA        |
| pDD162- <b>Phsp-16.2</b> ::Cas9+ PU6:: <i>osm-1-T2</i> sgRNA  | TGCCAGAAGAGGTGCCGTTTTAGAGCTA<br>GAAATAGC         | GCACCTCTTCTGGCAGACAAGACATCTCG<br>CAATAGGAGG         | PCR from pDD162- <b>Phsp-16.2</b> ::<br>Cas9+ PU6::Empty sgRNA        |
| pDD162- <b>Phsp-16.2</b> ::Cas9+ PU6:: <i>osm-12-T1</i> sgRNA | ACTGATTTCCGTCAAGTGTTTAGAGCT<br>AGAAATAGC         | CTTGAGCGAAATCAGTTCCAAGACATCTC<br>GCAATAGGAGG        | PCR from pDD162- <b>Phsp-16.2</b> ::<br>Cas9+ PU6::Empty sgRNA        |
| pDD162- <b>Phsp-16.2</b> ::Cas9+ PU6:: <i>osm-12-T2</i> sgRNA | ATACCTGTTCAATCGTGTTTAGAGCT<br>AGAAATAGC          | CGATTGAACAGGGTATCCAAGACATCTC<br>GCAATAGGAGG         | PCR from pDD162- <b>Phsp-16.2</b> ::<br>Cas9+ PU6::Empty sgRNA        |
| pDONR- <b>Pdyf-1</b> ::Cas9                                   | TGTAAGCTTGTCAAAATGGACAAAAAAT<br>ACAGCATCGG       | GAAGAGTAATTGGACTTAGGCGTAGTCT<br>GGGACGT             | PCR from pDD162- <b>Phsp-16.2</b> ::<br>Cas9+ PU6::Empty sgRNA        |
| pPD95.77- <b>Pdyci-1</b> :: <i>dyci-1</i> ::GFP               | GTACCCGTAGAAAAACGGTAGATTCTGC<br>AAGTTTGCGTG      | TTCTTCTCTTTACTCATGTATAAATTCT<br>CCGCTTCTCATTCTG     | PCR from N <sub>2</sub>                                               |
| pPD95.77- <b>Pdlc-1</b> :: <i>dlc-1</i> ::GFP                 | AGTGACCTGTTCTGTTCCCTTTGGAGC<br>CTCAATCGGTA       | CCCTCCACCTCCGCCTCCACCTCCAGACT<br>TGAATAGCAGGATGGCGA | PCR from N <sub>2</sub>                                               |
| pPD95.77- <b>Pdli-1</b> :: <i>dli-1</i> ::GFP                 | AGTGACCTGTTCTGTTGTTGCAACA<br>GTTTGTAGATCGGATTGAC | CCCTCCACCTCCGCCTCCACCTGCATCAC<br>TGTCCCGGGTTGAGG    | PCR from N <sub>2</sub>                                               |
| pPD95.77- <b>Plis-1</b> :: <i>lis-1</i> ::GFP                 | AGTGACCTGTTCTGTTGTTGCACACAA<br>TATTTCTCACGACC    | CCCTCCACCTCCGCCTCCACCACGGCATT<br>CCCAAACCTTTGCAC    | PCR from N <sub>2</sub>                                               |
| pDONR- <b>Pdyf-1</b> ::GFP:: <i>dyci-1</i>                    | GATGAACATACAAAAATGTCAGAACTGA<br>GGAACCTCGAA      | GAAGAGTAATTGGACCATGTATAAATTCT<br>CCGCTTCTCTCA       | PCR from N <sub>2</sub>                                               |
| pDONR- <b>Pdyf-1</b> :: <i>dli-1</i> ::GFP                    | TGTAAGCTTGTCAAAATGCCACCAACTG<br>CGCAACCACTGG     | CCCTCCACCTCCGCCTCCACCTGCATCAC<br>TGTCCCGGGTTGAGG    | PCR from N <sub>2</sub>                                               |
| pDONR- <b>Pdyf-1</b> ::GFP:: <i>lis-1</i>                     | GATGAACATACAAAAATGAGTTTGTCCG<br>AGAGGCAAAAAAG    | GAAGAGTAATTGGACTCAACGGCATTCCC<br>AAACTTTGC          | PCR from N <sub>2</sub>                                               |
| pDONR- <b>Pdlc-1</b> :: <i>dlc-1</i> ::GFP                    | AGTGACCTGTTCTGTTCCCTTTGGAGC<br>CTCAATCGGTA       | CCCTCCACCTCCGCCTCCACCTCCAGACT<br>TGAATAGCAGGATGGCGA | PCR from N <sub>2</sub>                                               |
| pDONR- <b>Pdyf-1</b> ::GFP:: <i>dyci-1<sup>mT1</sup></i>      | ACCTGTCTCAATATGTCTTCGACCTCAT<br>TCGATGAAAG       | CATATTGAGACAGGTCCGTTATTTCAACTG<br>AGCCAACAG         | PCR from pDONR- <b>Pdyf-1</b> ::GFP::<br><i>mdyci-1</i>               |
| pDONR- <b>Pdyf-1</b> ::GFP:: <i>dyci-1<sup>mT1+mT2</sup></i>  | GTACAAGCGGTTTGGACGCTGAAAAATT<br>CCAAGTCGAC       | CCAAACCGCTTGTACTGATAACAAAGATT<br>CGGTAAGC           | PCR from pDONR- <b>Pdyf-1</b> ::GFP::<br><i>dyci-1<sup>mT1</sup></i>  |
| pDONR- <b>Pdlc-1</b> :: <i>dlc-1<sup>mT1</sup></i> ::GFP      | GTGTTGCACAATCTATTGCGTCTGTG<br>CATGTCATC          | TAGATTGTGCAACACAAGCCCTCGAGAAA<br>TACAACAT           | PCR from pDONR- <b>Pdlc-1</b> :: <i>dlc-1</i> ::<br>GFP               |
| pDONR- <b>Pdlc-1</b> :: <i>dlc-1<sup>mT1+mT2</sup></i> ::GFP  | TATACAGTGCCATGTGGGTTGTATTTT<br>TTGTCCAAC         | ACATGGCACTGTATAGTGAAGAAACTT<br>TGGAAAGCTAC          | PCR from pDONR- <b>Pdlc-1</b> :: <i>dlc-1<sup>mT1</sup></i> ::<br>GFP |

Promoters are highlighted in bold.

Table S4. **Targets of CRISPR in *C. elegans***

| Gene          | CRISPR-Cas9 targets (POM) |                                               |
|---------------|---------------------------|-----------------------------------------------|
|               | Target                    | Sequence                                      |
| <i>dyci-1</i> | T1                        | AGGATATTCTCCGTC <b>CAAGTAGG</b>               |
|               | T2                        | AGTGTACAGACAGCGTGC <b>CACGG</b>               |
| <i>dlc-1</i>  | T1                        | CAACCTGGCATTGCATCGT <b>CGG</b>                |
|               | T2                        | GCCATCGACTGCGCC <b>ACCCAGG</b>                |
| <i>dli-1</i>  | T1                        | ACAGCAAATGCTGTGCTT <b>CCGG</b>                |
|               | T2                        | CTTCGACAGACGAAGA <b>AGTCGG</b>                |
| <i>dylt-3</i> | T1                        | TACACAATTTCTGTGTG <b>TCCGG</b>                |
| <i>dyrb-1</i> | T1                        | ATCATGATTGCTCCAGACA <b>AAGG</b>               |
| <i>lis-1</i>  | T1                        | CAACATGAGTTTGT <b>CGGAGAGG</b>                |
|               | T2                        | ATGATATCAAGCCACT <b>AGGAGG</b>                |
| <i>osm-3</i>  | T1                        | ATGGCACTGTGTTTGC <b>TATGG</b>                 |
| <i>xbx-1</i>  | T1                        | ACGAGTCATTT <b>CGCATTTGG</b>                  |
| <i>che-3</i>  | T1                        | GAAGTCGGGATTT <b>CCAATTTGG</b>                |
| <i>osm-1</i>  | T1                        | CAAGTTCCTCCGTACA <b>ATTTGG</b>                |
|               | T2                        | TCTGCCAGAAGAGGTGC <b>TGG</b>                  |
| <i>che-11</i> | T1                        | GAGTAGATTGGAGCC <b>ACGACGG</b>                |
| <i>dyci-1</i> | mT1                       | <u>AAGACAT</u> <u>ATTGAGACAGG</u> <u>TCCG</u> |
|               | mT2                       | <u>AGCGTCCAA</u> <u>ACCGCT</u> <u>GTACTG</u>  |
| <i>dlc-1</i>  | mT1                       | <u>CCACATGGCACTGT</u> <u>ATAGTAGG</u>         |
|               | mT2                       | <u>GCCATCGACTGCGCC</u> <u>ACAAG</u>           |

Bold text indicates PAM sequences. Underlined text indicates synonymous mutations of the CRISPR-Cas9 targets for the rescue experiments. Sequences are 5' to 3'.

Table S5. **Primers for molecular analysis**

| Target gene   | 5' sequence (5' to 3')                  | 3' sequence (5' to 3')                   |
|---------------|-----------------------------------------|------------------------------------------|
| <i>osm-3</i>  | CAAGGACTTCACGTT <b>CGATGGAGC</b>        | GTCAAAGAGTCAGGTC <b>AAGGGC</b>           |
| <i>xbx-1</i>  | CAGTATCAGAAGTT <b>CGTCGT</b>            | CACCAATACAAGTCTA <b>AGCTAG</b>           |
| <i>dyci-1</i> | GCCAGAGCTGAAATCT <b>CAGCGG</b>          | CGCTCATCGTCAGTCT <b>GGTTCC</b>           |
| <i>dlc-1</i>  | GGTTGACCGCAAGGCT <b>GTGATCAA</b>        | GCACACTGAAGATCCT <b>ACGCCACC</b>         |
| <i>dli-1</i>  | GCACGTGGAGCACAC <b>GATATCC</b>          | GCAGACGAAC <b>TTCTCCGAGG</b>             |
| <i>dylt-3</i> | TGCCATGACGGACCGAA <b>ATACTTT</b>        | ACTCATTGCCTTT <b>ACCGATTCTCGCC</b>       |
| <i>dyrb-1</i> | TCGTTCTCGATT <b>CACTGGCTGC</b>          | ACGTGGAGGGACACT <b>GTCTAAGCA</b>         |
| <i>lis-1</i>  | CTGCAAAAATCTGA <b>ATTTCTTTTTCAATCTC</b> | GATATTT <b>CATCTCTTGAACCTTAATGAGCAGG</b> |

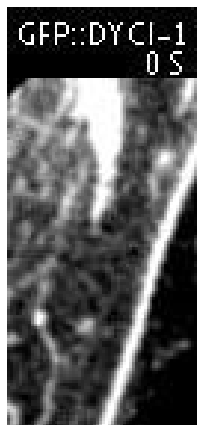

Video 1. **IFT of GFP::DYCI-1.** Transgenic *C. elegans* strain (GOU1467) expressing GFP-tagged DYCI-1 in cilia. Images were taken using a time-lapse fluorescence microscope (Axio Observer Z1 microscope; Carl Zeiss) attached to a spinning disk confocal scan head (CSU-X1 Spinning Disk Unit; Yokogawa Electric Corporation). Frames were taken continuously for 1.5 min. The display rate was 7 frames per second.

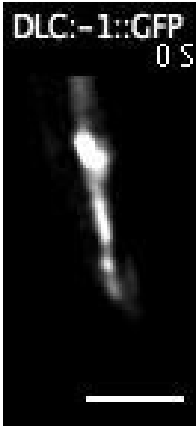

Video 2. **IFT of DLC-1::GFP.** Transgenic *C. elegans* strain (GOU1465) expressing GFP-tagged DLC-1 in cilia. Images were taken using a time-lapse fluorescence microscope (Axio Observer Z1 microscope; Carl Zeiss) attached to a spinning disk confocal scan head (CSU-X1 Spinning Disk Unit; Yokogawa Electric Corporation). Frames were taken continuously for 1.5 min. The display rate was 7 frames per second.

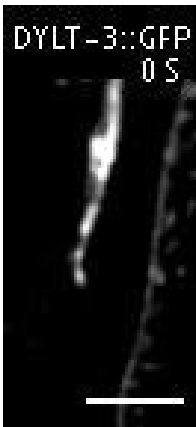

Video 3. **IFT of DYLT-3::GFP.** Transgenic *C. elegans* strain (GOU1466) expressing GFP-tagged DYLT-3 in cilia. Images were taken using a time-lapse fluorescence microscope (Axio Observer Z1 microscope; Carl Zeiss) attached to a spinning disk confocal scan head (CSU-X1 Spinning Disk Unit; Yokogawa Electric Corporation). Frames were taken continuously for 1.5 min. The display rate was 7 frames per second.

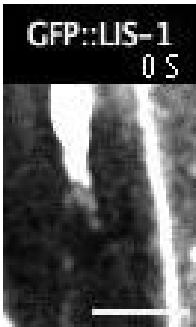

Video 4. **IFT of GFP::LIS-1.** Transgenic *C. elegans* strain (GOU1472) expressing GFP-tagged LIS-1 in cilia. Images were taken using a time-lapse fluorescence microscope (Axio Observer Z1 microscope; Carl Zeiss) attached to a spinning disk confocal scan head (CSU-X1 Spinning Disk Unit; Yokogawa Electric Corporation). Frames were taken continuously for 1.5 min. The display rate was 7 frames per second.
